# Supplementary material for: COVID-19 Severity and Mortality in Solid Organ Transplantation: Differences between Liver, Heart, and Kidney Recipients
Source: MDPI journal article supplement (doi:10.3390/transplantology2030030), 2021-08-18
Supplement: s1 [file s1]

# Supplementary Materials: COVID-19 Severity and Mortality in Solid Organ Transplantation: Differences between Liver, Heart, and Kidney Recipients

Ricardo Wesley Alberca \*, Gabriela Gama Freire Alberca, Lucas Chaves Netto, Raquel Leão Orfali, Sarah Cristina Gozzi-Silva, Alberto José da Silva Duarte, Valeria Aoki, Maria Notomi Sato and Gil Benard

**Table S1.** Solid organ transplant treatment.

| Pre and during COVID-19 treatment                 |         |       |        |       |
|---------------------------------------------------|---------|-------|--------|-------|
|                                                   | CONTROL | LIVER | KIDNEY | HEART |
| Tacrolimus                                        | -       | 6     | -      | -     |
| Cyclosporine                                      | -       | -     | 1      | -     |
| Tacrolimus + mycophenolate mofetil                | -       | 1     | 5      | -     |
| Tacrolimus + azathioprine                         | -       | -     | 1      | -     |
| Tacrolimus + sirolimus                            | -       | -     | 2      | -     |
| Tacrolimus + everolimus                           | -       | -     | 1      | -     |
| Tacrolimus + cyclosporine                         | -       | -     | -      | 1     |
| Mycophenolate mofetil + prednisone                | -       | -     | 1      | -     |
| Mycophenolate mofetil + cyclosporine              | -       | -     | 1      | -     |
| Tacrolimus + mycophenolate mofetil + prednisone   | -       | -     | 9      | 1     |
| Tacrolimus + sirolimus + prednisone               | -       | -     | -      | 1     |
| Mycophenolate mofetil + prednisone + cyclosporine | -       | -     | 4      | 4     |
| COVID-19 treatment                                |         |       |        |       |
|                                                   | CONTROL | LIVER | KIDNEY | HEART |
| Antibiotics                                       | 25      | 7     | 25     | 7     |
| Anticoagulants                                    | 25      | 7     | 25     | 7     |
| Antivirals                                        | 10      | 1     | 8      | 2     |
| Systemic corticosteroids                          | 20      | 7     | 22     | 7     |
